# Supplementary material for: Novel quadrilateral-pore 2D-COFs as visible-light driven catalysts evaluated by the descriptor of integrated pz-orbital population
Source: Royal Society of Chemistry journal article supplement (doi:10.1039/d2nr03706h), 2022-01-01
Supplement: d2nr03706h1.pdf [file d2nr03706h1.pdf]

## Electronic Supplementary Information

### **Novel Quadrilateral-pore 2D-COFs as Visible-Light Driven Catalysts Evaluated by the Descriptor of Integrated $p_z$ -orbital population**

**Rui Zhang,<sup>1,2</sup> Zhi-Wei Wang,<sup>1</sup> Zhao-Di Yang<sup>2,\*</sup> and Fu-Quan Bai<sup>1,3,4,\*</sup>**

*1, International Joint Research Laboratory of Nano-Micro Architecture Chemistry, Institute of Theoretical Chemistry and College of Chemistry, Jilin University, Changchun 130023, People's Republic of China.*

*2, School of Materials Science and Chemical Engineering, Harbin University of Science and Technology, Harbin 150080, People's Republic of China.*

*3, Key Laboratory of Physics and Technology for Advanced Batteries (Ministry of Education), Jilin university, Changchun 130023, People's Republic of China.*

*4, Beijing National Laboratory for Molecular Sciences, Beijing 100013, People's Republic of China.*

*\*Corresponding authors. Emails: [baifq@jlu.edu.cn](mailto:baifq@jlu.edu.cn) (Fu-Quan Bai); [yangzhaodi@163.com](mailto:yangzhaodi@163.com) (Zhao-Di Yang)*

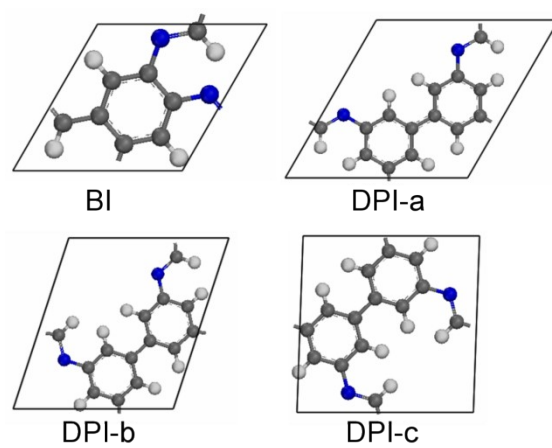

**Figure S1.** The periodical structures of the BI, DPI-a, DPI-b and DPI-c.

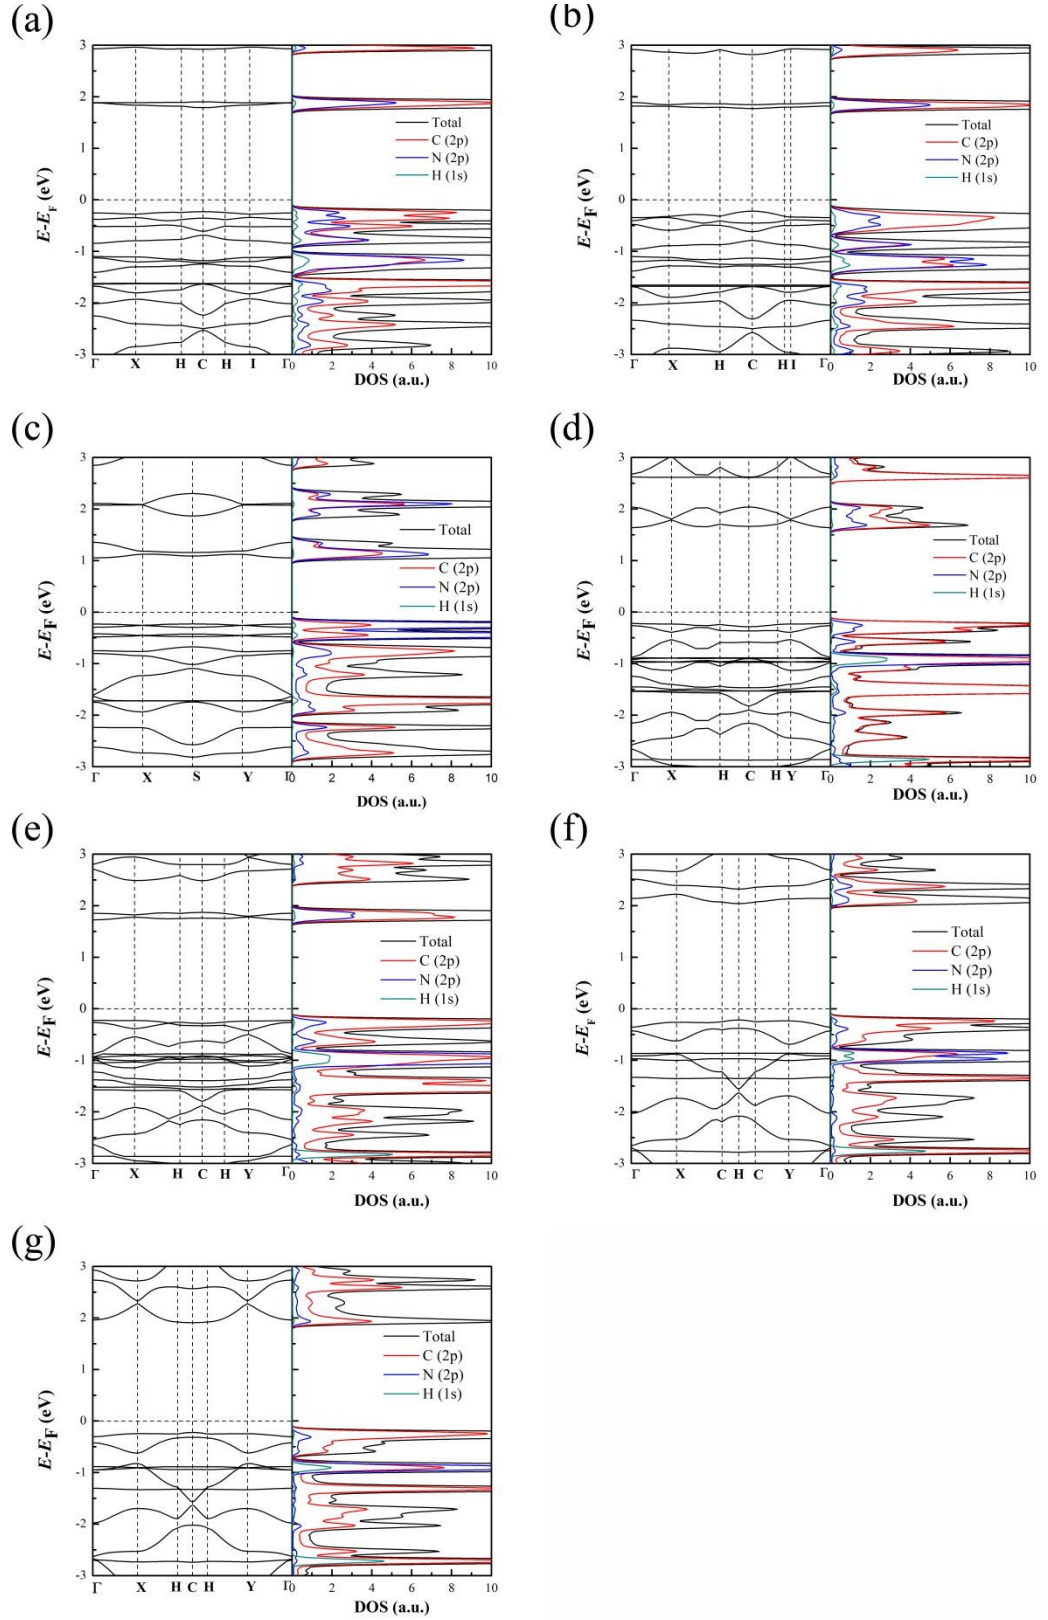

**Figure S2.** Band structures and density of states (DOS) of the (a) DPBI-b, (b) DPBI-c, (c) DPBA (d) TPBI-b, (e) TPBI-c, (f) TPI-a and (g) TPI-b, respectively. Fermi level was set to zero.

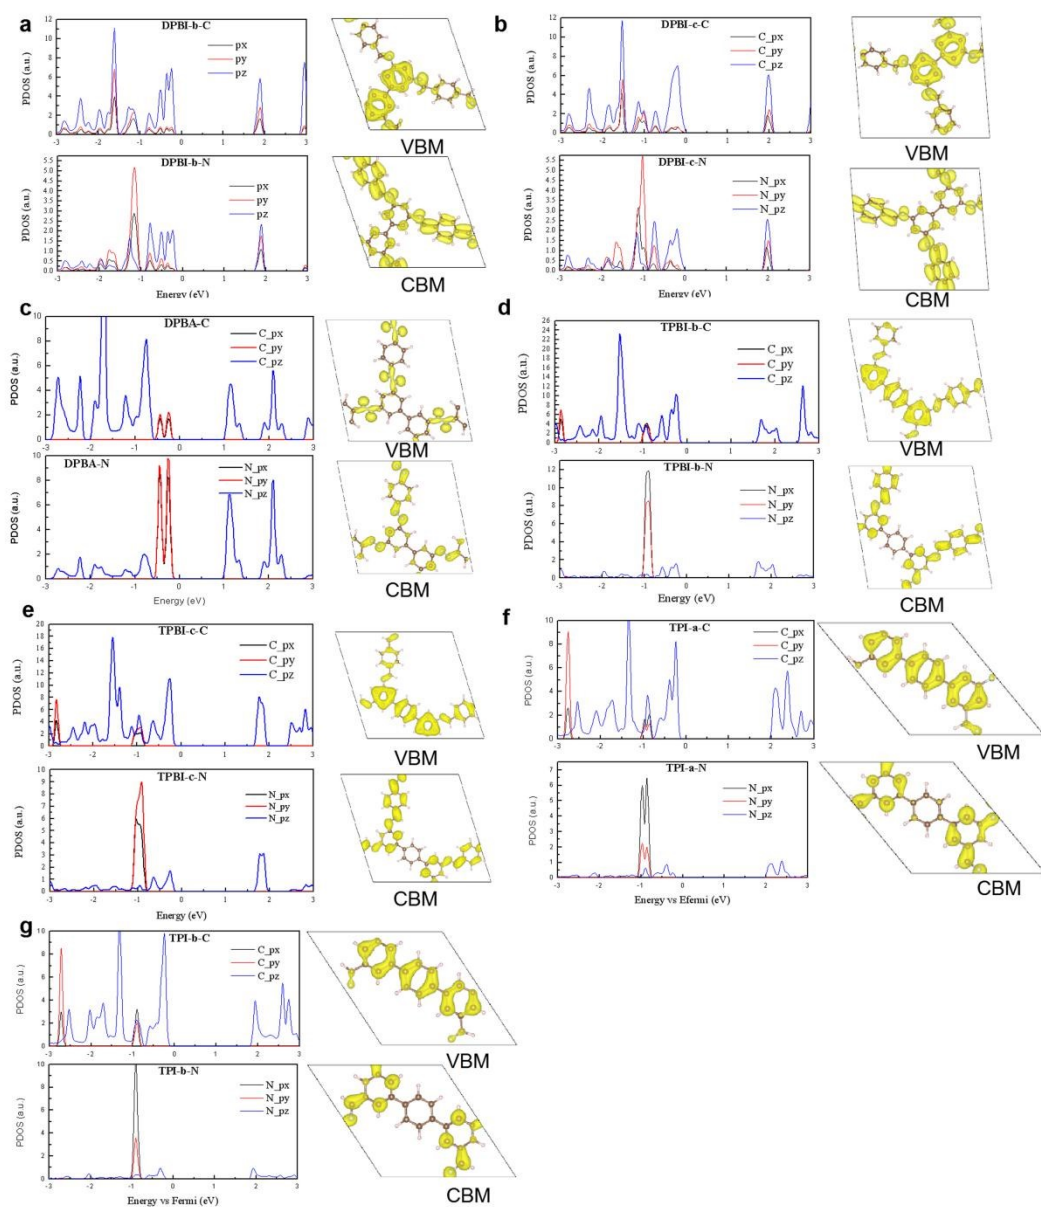

**Figure S3.** Projected density of states (PDOS) on atomic orbitals and charge densities of the VBM and CBM for the (a) DPBI-b, (b) DPBI-c, (c) DPBA (d) TPBI-b, (e) TPBI-c, (f) TPI-a and (g) TPI-b, respectively. Fermi level was set to zero.

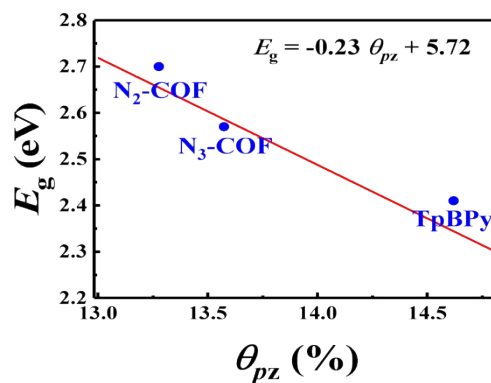

**Figure S4.** Predicted and corresponding experimental band gaps versus the descriptor  $\theta_{pz}$ . The line represents the corrected linear relationship between the band gaps and the  $\theta_{pz}$ .

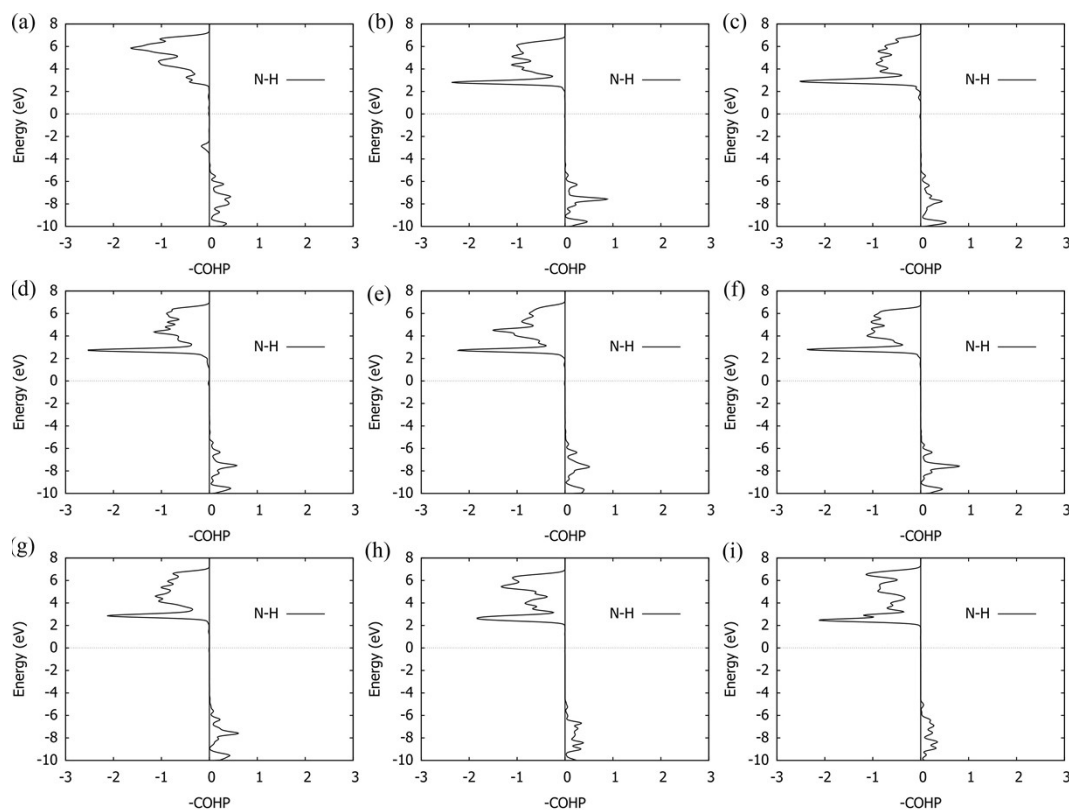

**Figure S5.** COHP bonding analysis of the N-H interaction on the N active sites of the (a) BBI, (b) DPBI-a, (c) DPBI-b, (d) DPBI-c, (e) TPBI-a, (f) TPBI-b, (g) TPBI-c, (h) TPI-a and (i) TPI-b. The Fermi levels were set to zero energy. The bonding interaction occurs at COHP larger than zero, whereas the anti-bonding interaction occurs at COHP smaller than zero.

**Table S1** The integrated pz-orbital population ( $\theta_{pz}$ , %), experimental band gaps ( $E_g$ , eV) and free energy changes of H adsorption ( $\Delta G_{H^*}$ , eV) for the 6 photocatalytic 2D-COFs.

|                           | N <sub>2</sub> -COF <sup>a)</sup> | N <sub>3</sub> -COF <sup>a)</sup> | Tp-BPy <sup>b)</sup> |
|---------------------------|-----------------------------------|-----------------------------------|----------------------|
| $\theta_{pz}$             | 13.27                             | 13.57                             | 14.62                |
| $E_g$                     | 2.70 <sup>a)</sup>                | 2.57 <sup>a)</sup>                | 2.41 <sup>b)</sup>   |
| $\Delta G_{H^*}(U_e > 0)$ | -3.30                             | -2.93                             | -3.05                |

a) Cited from Ref. [32]. The values in parenthesis are reported in experiment. b) Cited from Ref. [53]. The value in parenthesis is reported in experiment.

## Reference

- [32] V. S. Vyas, F. Haase, L. Stegbauer, G. Savasci, F. Podjaski, C. Ochsenfeld and B. V. Löstch, *Nat. Comm.*, 2015, **6**, 8508.
- [53] Z. Mi, T. Zhou, W. Weng, J. Unruangsri, K. Hu, W. Yang, C. Wang, K. A.-I. Zhang and J. Guo, *Angew. Chem. Int. Ed.*, 2021, **60**, 9642-9649.
